# Supplementary material for: Controllable CO2conversion in high performance proton conducting solid oxide electrolysis cells and the possible mechanisms
Source: Royal Society of Chemistry journal article supplement (doi:10.1039/c8ta12458b), 2019-01-01
Supplement: c8ta12458b1.pdf [file c8ta12458b1.pdf]

## Supporting Information

# Controllable CO<sub>2</sub> conversion via high performance proton conducting solid oxide electrolysis cell and the possible mechanisms

*Nai Shi, <sup>a</sup>Yun Xie, <sup>a</sup>Daoming Huan, <sup>a</sup>Yi Yang, <sup>a</sup>Shuangshuang Xue, <sup>a</sup>Zeming Qi, <sup>b</sup>*

*Yang Pan, <sup>b</sup>Ranran Peng, <sup>\*acd</sup>Changrong Xia, <sup>a</sup>Yalin Lu<sup>\*abcd</sup>*

<sup>a</sup>CAS Key Laboratory of Materials for Energy Conversion, Department of Materials  
Science and Engineering, University of Science and Technology of China, Hefei,  
230026 Anhui, China

<sup>b</sup>National Synchrotron Radiation Laboratory, University of Science and Technology  
of China, Hefei 230026, P. R. China

<sup>c</sup>Synergetic Innovation Center of Quantum Information & Quantum Physics,  
University of Science and Technology of China, Hefei, Anhui 230026, China

<sup>d</sup>Hefei National Laboratory of Physical Science at the Microscale, University of  
Science and Technology of China, Hefei, 230026 Anhui, China

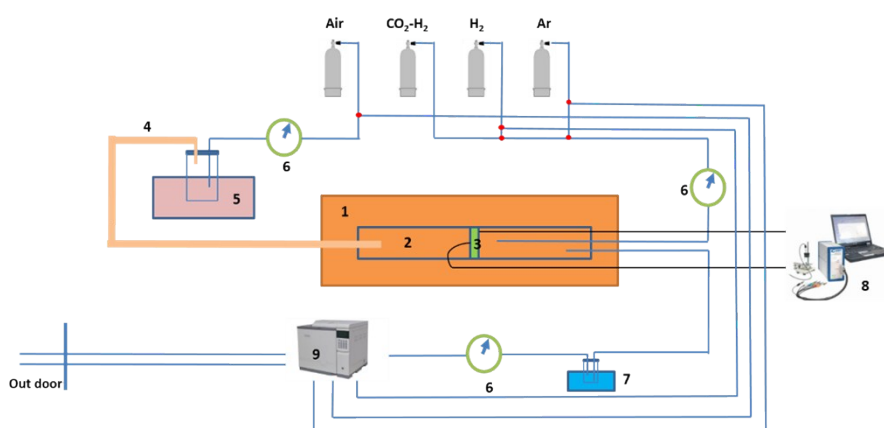

1.Furnace 2.Alumina tube 3.P-SOEC 4.Heater band 5.Water bath 6.Mass flowmeter 7.Cold trap  
8.Electrochemical workstation 9. Gas chromatography

**Figure S1.** Schematic illustration of the testing system for proton conducting solid oxide electrolysis cells

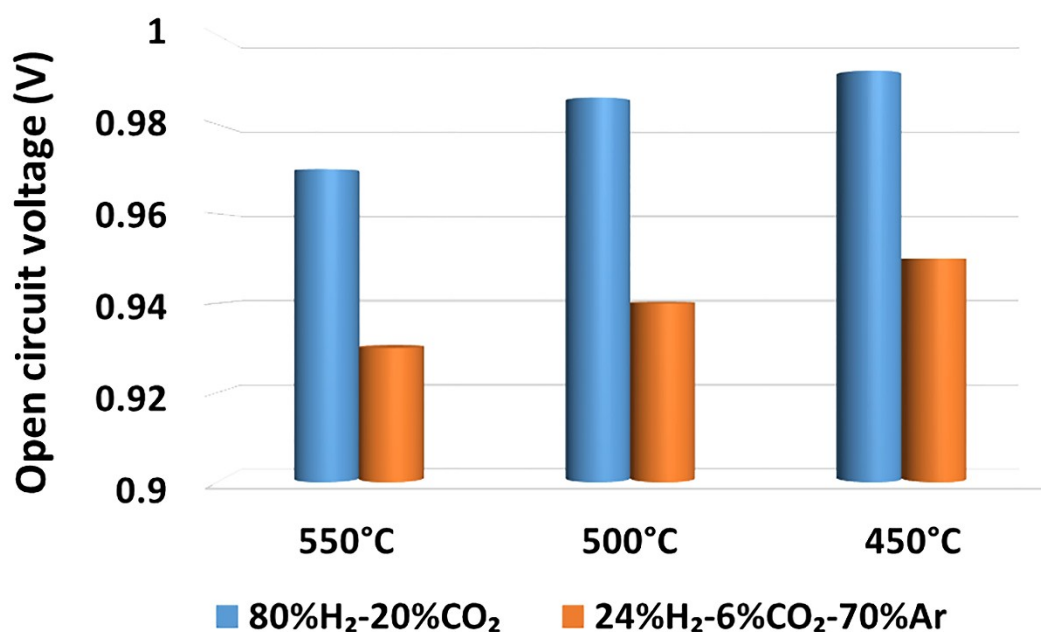

**Figure S2.** Open circuit voltages of single cell measured from 550 to 450 °C with 80 % H<sub>2</sub>-20 % CO<sub>2</sub> (blue) and 24 % H<sub>2</sub>-6 % CO<sub>2</sub>-70 % Ar (orange) injected to the cathode, respectively.

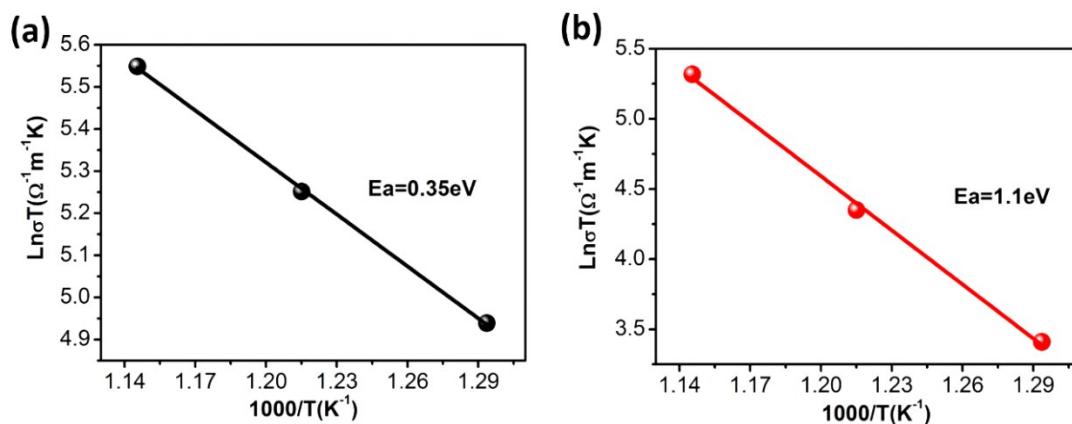

**Figure S3.** Temperature dependence of (a)  $R_b$  and (b)  $R_p$  of P-SOEC tested at OCV condition with 20 % CO<sub>2</sub>- 80 % H<sub>2</sub> mixture in cathode. Activation energies for  $R_b$  and  $R_p$  are also calculated.

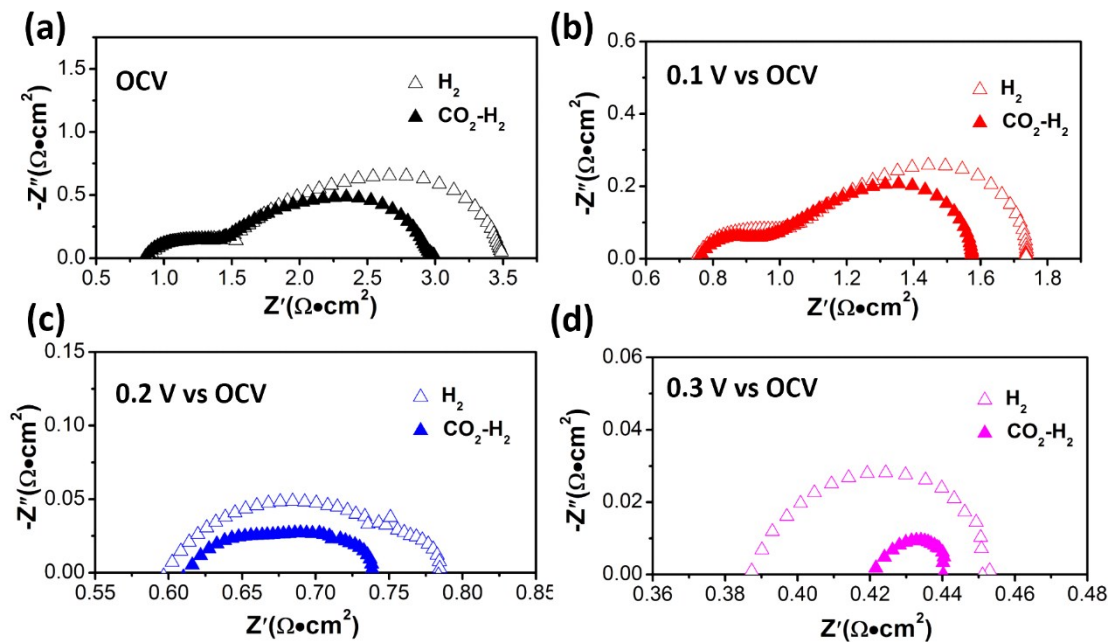

**Figure S4.** Impedance spectra of P-SOEC measured at 550 °C and electrolysis voltages of (a) 0 V, (b) 0.1 V, (c) 0.2 V, and (d) 0.3 V (vs. OCV) with H<sub>2</sub> (hollow) and H<sub>2</sub>-CO<sub>2</sub> mixture (solid) injected to cathode.

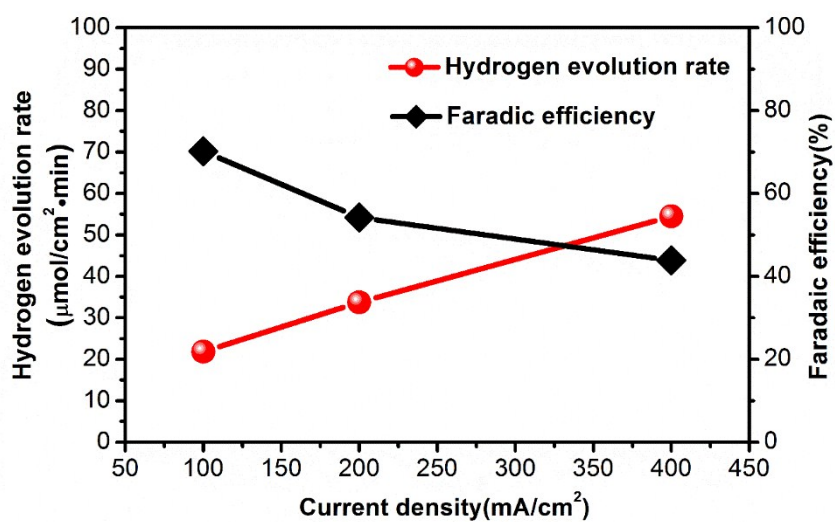

**Figure S5.** Hydrogen evolution rate (red) and Faradic efficiency (black) of pure steam electrolysis in P-SOEC as function of electrolysis current density measured at 550 °C.

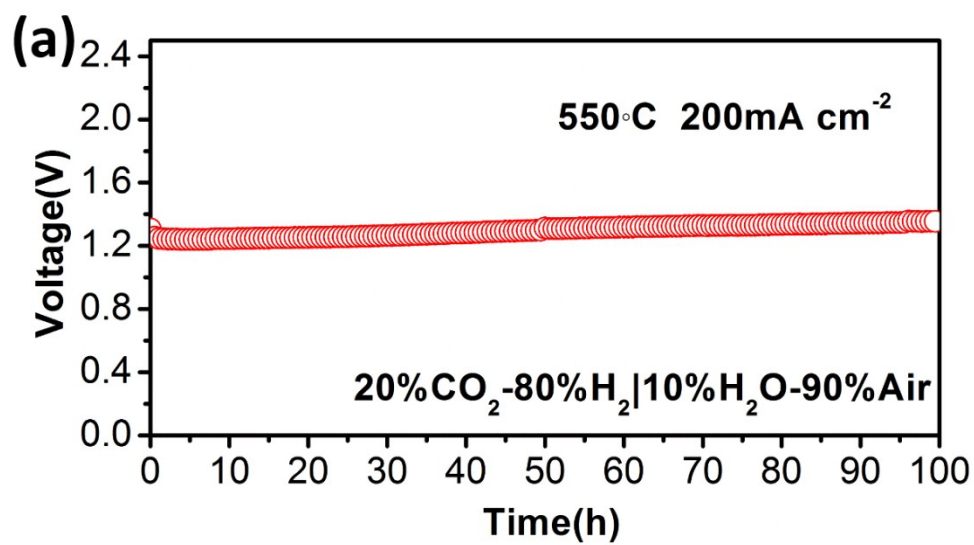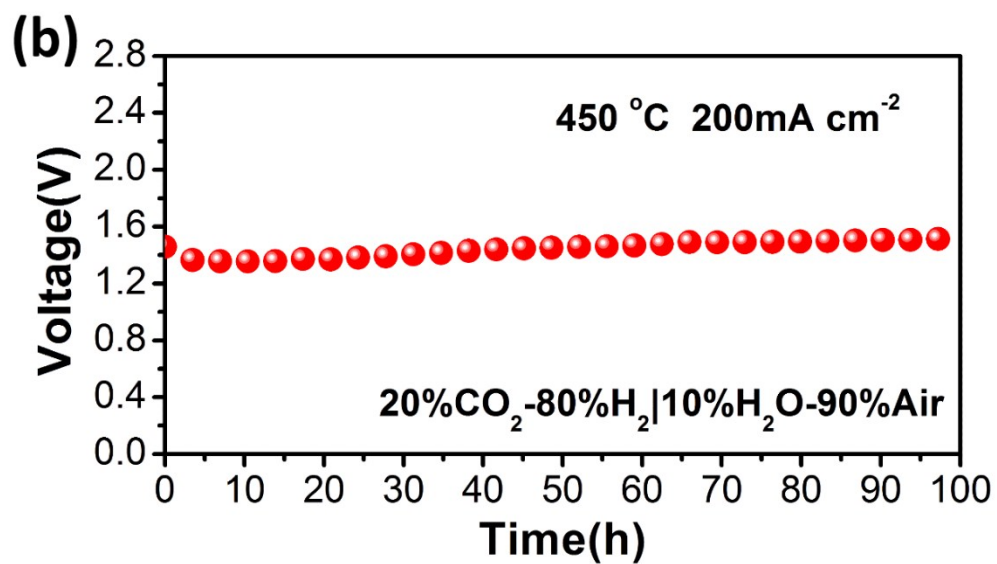

**Figure S6.** Long term stability of CO<sub>2</sub> conversion via P-SOEC measured at (a) 550 °C and (b) 450 °C under an electrolysis current density of 200 mA cm<sup>-2</sup>.

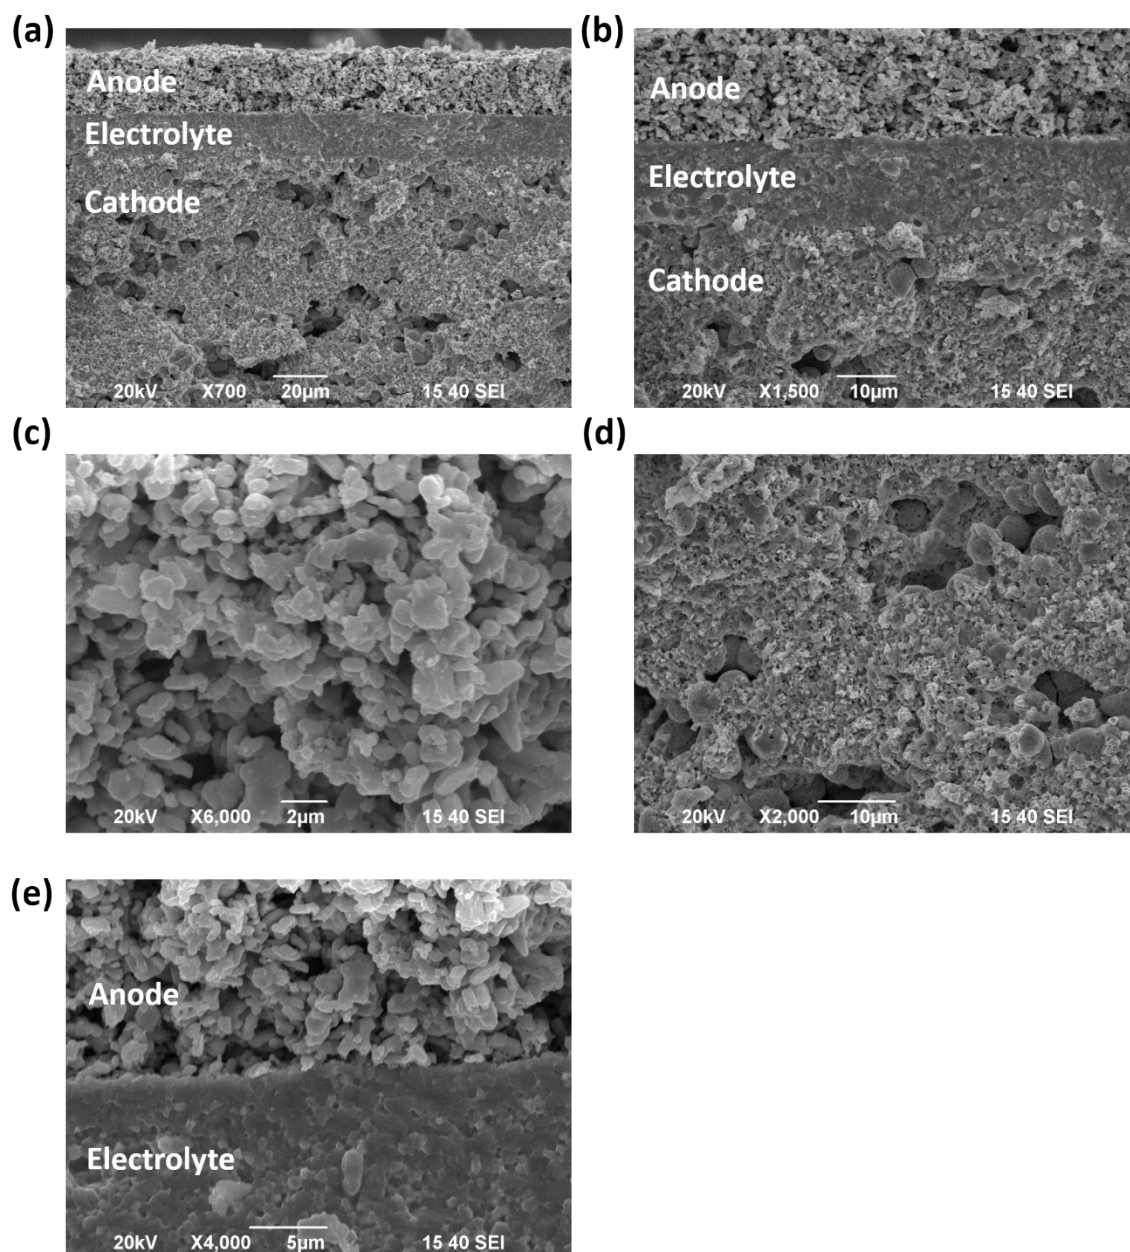

**Figure S7.** SEM pictures of fractured single cell after testing at 450 °C for 100 hours: (a) overview of single cell, (b) enlarged view of the interface between electrode and electrolyte, (c) enlarged view of anode, (d) enlarged view of cathode and (e) enlarged view of electrolyte and anode.

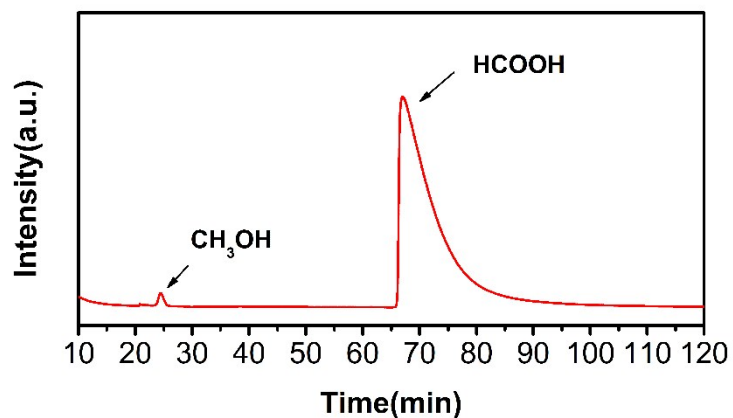

**Figure S8.** Composition of condensed liquid for cathode outlet gas.

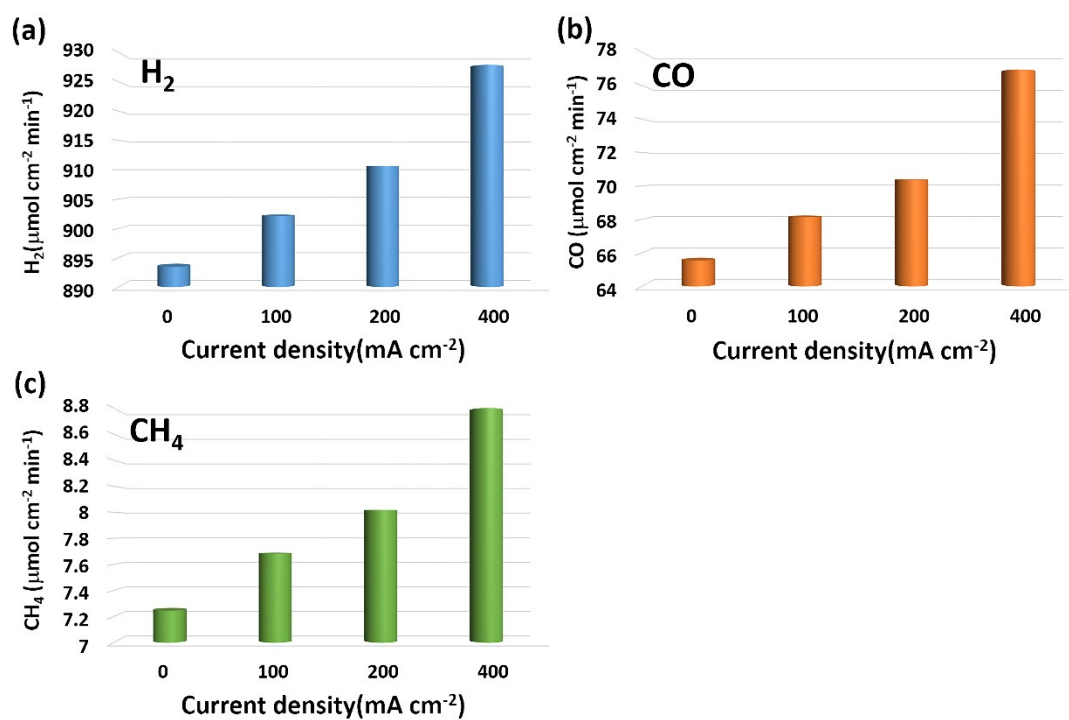

**Figure S9.** Flow rates of (a)  $\text{H}_2$ , (b)  $\text{CO}$  and (c)  $\text{CH}_4$  in cathode outlet gas as function of applied current densities measured at 550 °C.

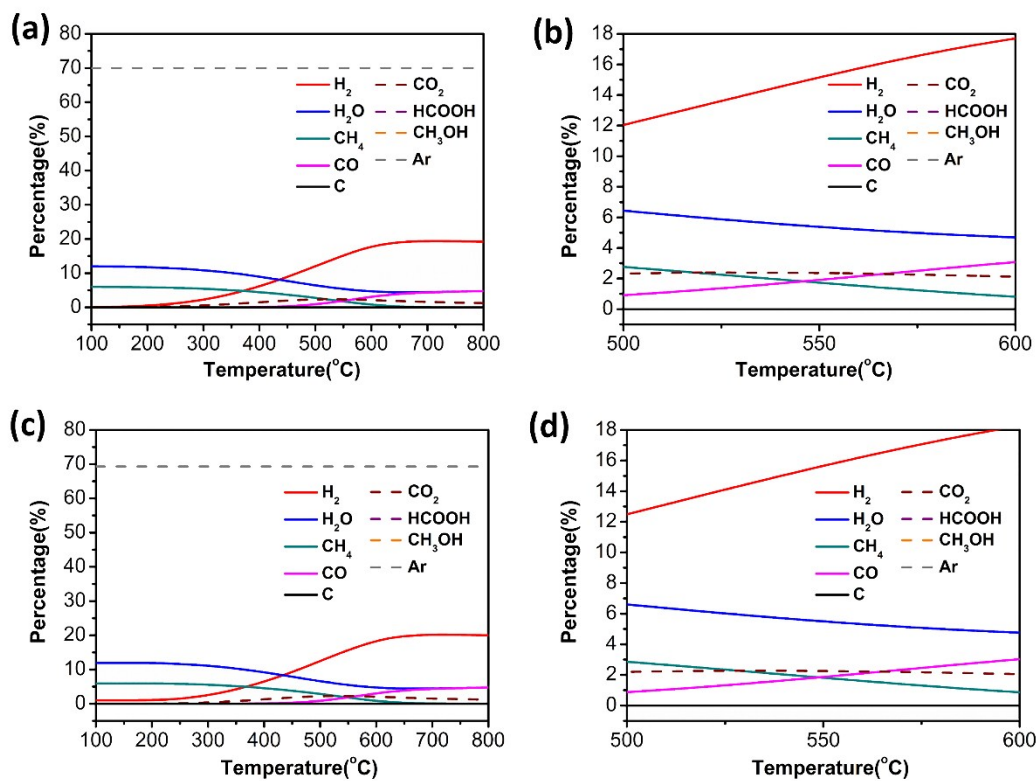

**Figure S10.** Temperature dependence of (a) theoretical equilibrium composition and (b) its enlarged view for the original gas of 6 % CO<sub>2</sub>-24 % H<sub>2</sub>-70 % Ar. Temperature dependence of (c) theoretical equilibrium composition and (d) its enlarged view for the gas with additional 0.469 % H<sub>2</sub> in 6 % CO<sub>2</sub>-24 % H<sub>2</sub>-70 % Ar mixture.



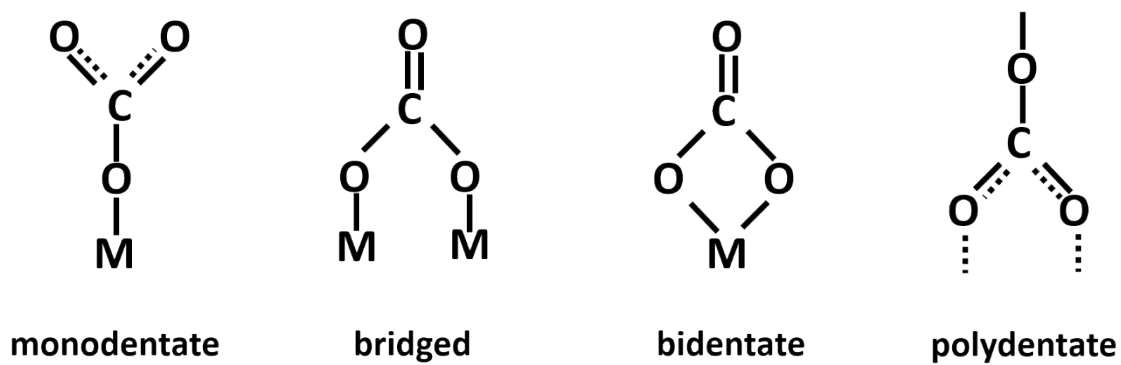

**Figure S11.** Illustration of various carbonate configurations

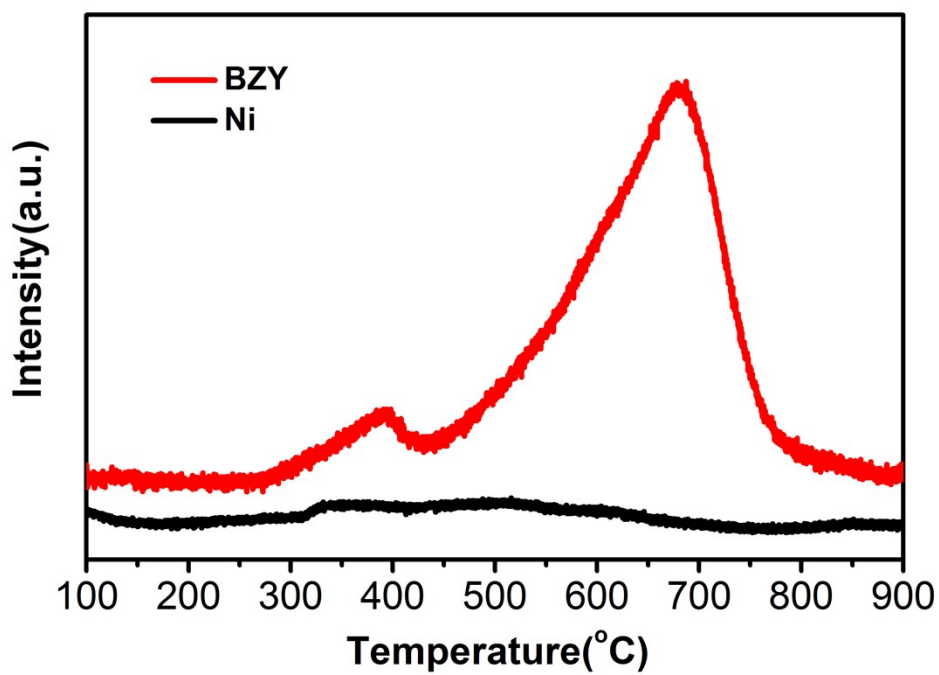

**Figure S12.** CO<sub>2</sub>-TPD spectrum of BZY and nickel powders.

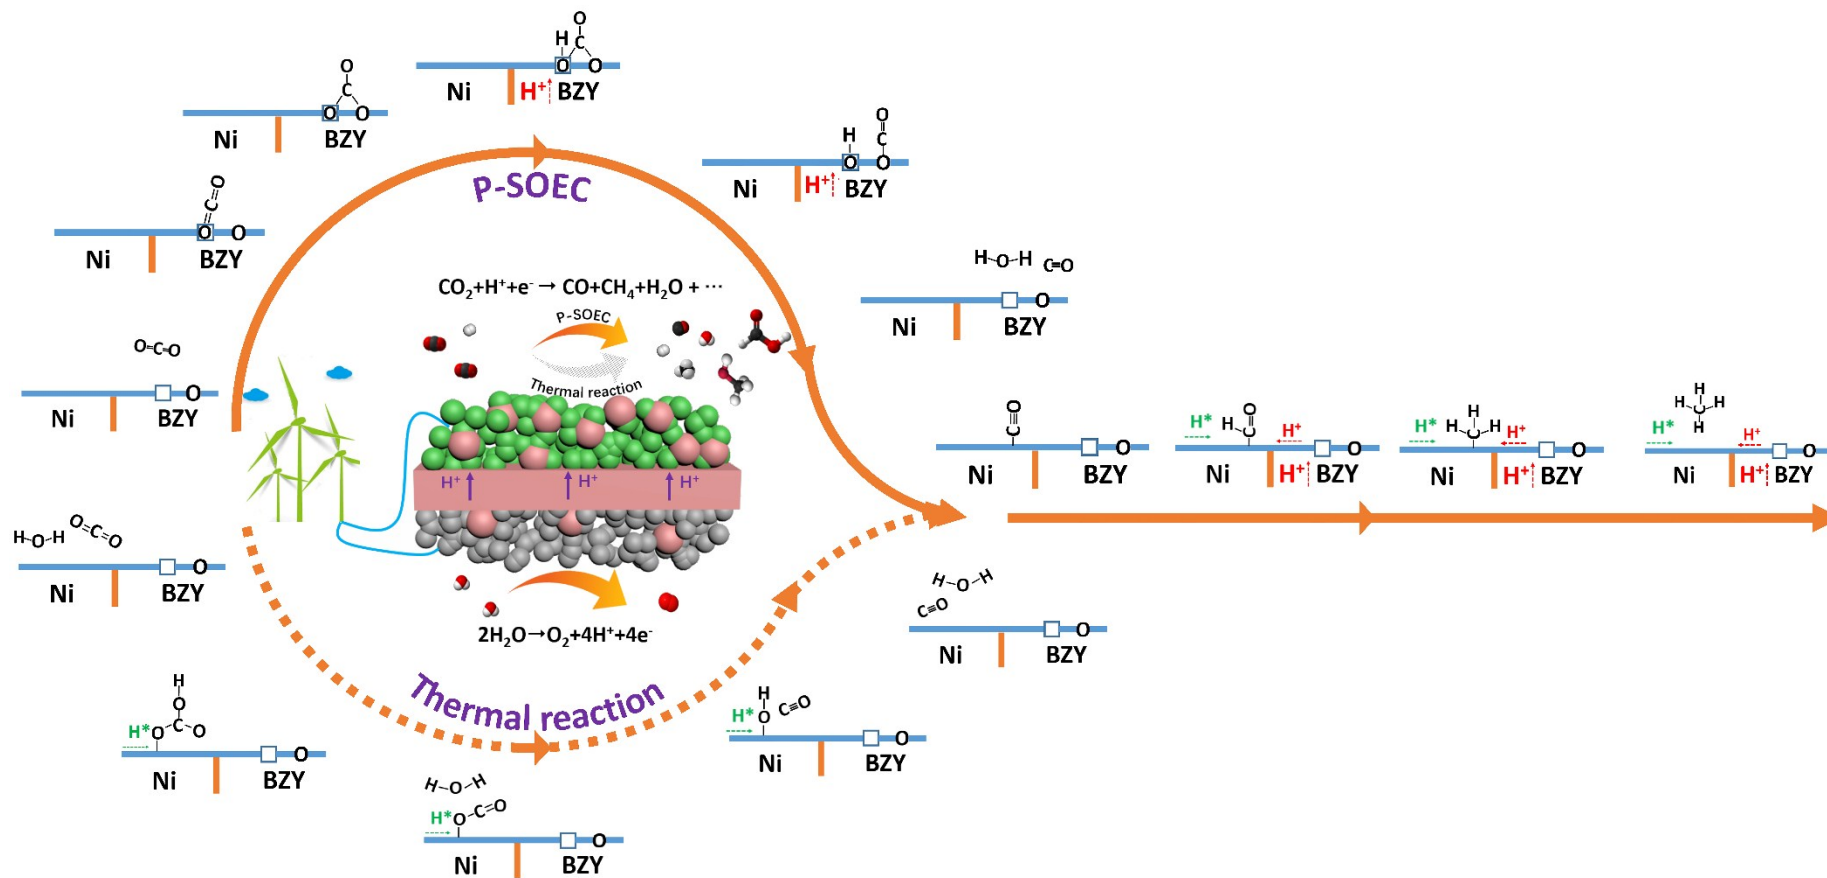

**Figure S13.** Possible schematic diagram of CO<sub>2</sub> reduction reactions in P-SOEC. H<sup>+</sup>(red) indicates the protons transferred from anode, H\*(green)

indicates the hydrogen atoms from hydrogen dissociation in nickel.

**Table S1.** Performance of SOECs reported in the literature in similar test conditions.

BCZYZ ( $\text{BaCe}_{0.5}\text{Zr}_{0.3}\text{Y}_{0.16}\text{Zn}_{0.04}\text{O}_3$ ), LSMC ( $(\text{La}_{0.75}\text{Sr}_{0.25})_{0.95}\text{Mn}_{0.5}\text{Cr}_{0.5}\text{O}_3$ ), CMF ( $\text{Ce}_{0.6}\text{Mn}_{0.3}\text{Fe}_{0.1}\text{O}_2$ ) LSFM ( $\text{La}_{0.6}\text{Sr}_{0.4}\text{Fe}_{0.9}\text{Mn}_{0.1}\text{O}_3$ ), LSCF ( $\text{La}_{0.6}\text{Sr}_{0.4}\text{Co}_{0.2}\text{Fe}_{0.8}\text{O}_3$ ), GDC ( $\text{Gd}_{0.2}\text{Ce}_{0.8}\text{O}_2$ ), BZCYYZ ( $\text{BaZr}_{0.1}\text{Ce}_{0.7}\text{Y}_{0.1}\text{Yb}_{0.06}\text{Zn}_{0.04}\text{O}_3$ ), BCZDy ( $\text{BaCe}_{0.3}\text{Zr}_{0.5}\text{Dy}_{0.2}\text{O}_3$ ), NBN ( $\text{Nd}_{1.95}\text{Ba}_{0.05}\text{NiO}_4$ ), BZY ( $\text{BaZr}_{0.8}\text{Y}_{0.2}\text{O}_3$ ), SFM ( $\text{Sr}_2\text{Fe}_{1.5}\text{Mo}_{0.5}\text{O}_6$ ), BZCY5 ( $\text{BaZr}_{0.3}\text{Ce}_{0.5}\text{Y}_{0.2}\text{O}_3$ ), SEFC ( $\text{SrEu}_2\text{Fe}_{1.8}\text{Co}_{0.2}\text{O}_7$ ) YSZ ( $\text{Zr}_{0.85}\text{Y}_{0.15}\text{O}_2$ ), LSM ( $\text{La}_{0.8}\text{Sr}_{0.2}\text{MnO}_3$ ), BZCY7 ( $\text{BaCe}_{0.7}\text{Zr}_{0.1}\text{Y}_{0.2}\text{O}_3$ ), LSN ( $\text{La}_{1.2}\text{Sr}_{0.8}\text{NiO}_4$ ), PNO ( $\text{Pr}_2\text{NiO}_4$ ), BZCY6 ( $\text{BaZr}_{0.2}\text{Ce}_{0.6}\text{Y}_{0.2}\text{O}_3$ ), NBSCF ( $\text{NdBa}_{0.5}\text{Sr}_{0.5}\text{Co}_{1.5}\text{Fe}_{0.5}\text{O}_6$ )

| Single cell configuration<br>(cathode electrolyte anode) | Test atmosphere<br>(cathode anode)                                   | Open circuit<br>voltage(V) | Applied<br>Voltage<br>(V) | Stability<br>test | Current<br>density<br>(A/cm <sup>2</sup> ) | Year/<br>reference |
|----------------------------------------------------------|----------------------------------------------------------------------|----------------------------|---------------------------|-------------------|--------------------------------------------|--------------------|
| Ni-BCZYZ BCZYZ LSMC-<br>BCZYZ                            | CO <sub>2</sub>  5%H <sub>2</sub> O-95%Ar                            | 0.1 (600 °C)               | 2                         | 12h               | 0.1                                        | 2013[1]            |
| CMF-<br>LSFM/LSCF+GDC BZCYY<br>Z Ni-Fe                   | CO <sub>2</sub>  3%H <sub>2</sub> O-97%H <sub>2</sub>                | 0 (600 °C)                 | 1.3                       | –                 | 0.25                                       | 2015[2]            |
| Fe-BCZYZ BCZYZ  Ni-<br>BCZYZ                             | CO <sub>2</sub>  3%H <sub>2</sub> O-97%H <sub>2</sub>                | 0 (614 °C)                 | 2.6                       | 1h                | 1.5                                        | 2011[3]            |
| Ni-BCZDy BCZDy NBN-<br>BCZDy                             | 50%CO <sub>2</sub> -50%H <sub>2</sub><br> 30%H <sub>2</sub> O-70%Air | 0.8 (700 °C)               | 1.5                       | 10h               | 1                                          | 2018[4]            |
| Ni-BZY BZY BZY-SFM                                       | 90%N <sub>2</sub> -10%H <sub>2</sub><br> 3%H <sub>2</sub> O-97%Air   | 0.92 (550 °C)              | 1.3                       | 100h              | 0.1                                        | 2017[5]            |
| Ni-BZY BZY BZY-LSCF                                      | 96%Ar-4%H <sub>2</sub><br> 3%H <sub>2</sub> O-97%Air                 | 0.86 (600 °C)              | 1.32                      | 80h               | 0.055                                      | 2015[6]            |
| Ni-BZCY5 BZCY5 BZCY5-<br>SEFC                            | 3%H <sub>2</sub> O-97%H <sub>2</sub><br> 10%H <sub>2</sub> O-90%Air  | 0.99 (600 °C)              | 1.5                       | 230h              | 1.05                                       | 2018[7]            |
| Ni-YSZ YSZ YSZ-LSM                                       | 11.4%CO <sub>2</sub> -68.6%H <sub>2</sub> -                          | 0.09 (800 °C)              | 1.3                       | 24h               | 0.4                                        | 2014[8]            |

|                                                  |                                                                           |                                                                                |               |      |      |           |
|--------------------------------------------------|---------------------------------------------------------------------------|--------------------------------------------------------------------------------|---------------|------|------|-----------|
|                                                  | 20%H <sub>2</sub> O Air                                                   |                                                                                |               |      |      |           |
| BaCO <sub>3</sub> modified<br>Ni-YSZ YSZ YSZ-LSM | 20%CO <sub>2</sub> -80%H <sub>2</sub>  Air                                | 0.05 (800 °C)                                                                  | 1.3           | 280h | 0.69 | 2018[9]   |
| Ni-BZCY7 BZCY7 LSN                               | 3%H <sub>2</sub> O-<br>97%H <sub>2</sub>  20%H <sub>2</sub> O-<br>80%Air  | 0.98 (700 °C)                                                                  | 1.3           | 40h  | 1.37 | 2018[10]  |
| Ni-BZCY6 BZCY6 PNO-<br>BZCY6                     | H <sub>2</sub>  40%H <sub>2</sub> O-60%Air                                | 1 (600 °C)                                                                     | 1.5           | –    | 0.6  | 2018[11]  |
| Ni-<br>BZCYYb BZCYYb NBSCF-<br>BZCYYb            | 10%H <sub>2</sub> O-<br>90%H <sub>2</sub>  10%H <sub>2</sub> O-<br>90%Air | 1.03 (550 °C)                                                                  | 1.3           | 60h  | 0.42 | 2018[12]  |
| Ni-BZY BZY BZY-SEFC                              | 20%CO <sub>2</sub> -80%H <sub>2</sub><br> 10%H <sub>2</sub> O-90%Air      | 0.94 (600 °C)                                                                  | 1.5           | 100h | 1.73 | This work |
|                                                  |                                                                           |                                                                                | 1.3           |      | 0.76 |           |
|                                                  |                                                                           | 0.97 (550 °C)                                                                  | 1.5           |      | 1.23 |           |
|                                                  |                                                                           |                                                                                | 1.3           |      | 0.45 |           |
|                                                  |                                                                           | 1 (450 °C)                                                                     | 1.5           |      | 0.41 |           |
|                                                  |                                                                           | 6%CO <sub>2</sub> -24%H <sub>2</sub> -<br>70%Ar 10%H <sub>2</sub> O-<br>90%Air | 0.93 (550 °C) |      | 1.3  |           |

## Calculations

### 1. Selectivity

The selectivity of CO and CH<sub>4</sub> are calculated by the equation (1):

$$Selectivity(\%) = \frac{\text{mole of target product} * \text{carbon atoms in molecular formula}}{\text{mole of reacted } CO_2} * 100\%$$

(1)

## 2. Faradic efficiency

The faradic efficiency is calculated by equation (2):

$$\eta = \frac{mnF}{It} \quad (2)$$

where  $n$  is mole of hydrogen,  $I$  is current,  $t$  is time,  $m$  is transport number of electron, and  $F$  is faradic constant

## 2. Thermal equilibrium composition calculation

Thermal equilibrium gas composition is calculated through minimize Gibbs method (equation.3):

$$G(n_i) = \sum_i^k n_i \mu_i \quad (3)$$

Where  $n_i$  is the mole of species  $i$  and  $\mu_i$  is the chemical potential of species  $i$ . Take the derivation of  $n_i$ , and at the equilibrium state, there should be:

$$d(G_{system})_{T,P} = 0 \quad (4)$$

Achieving  $n_i$  by solving equation (4).

Assuming the Faradaic efficiency is 43.8% at the electrolysis current density of 400mAcm<sup>2</sup>, and the calculated hydrogen production is 1.22 ml/min·cm<sup>2</sup> according to equation (5):

$$n = \frac{\eta It}{mF} \quad (5)$$

where  $n$  is mole of hydrogen,  $I$  is current,  $t$  is time,  $m$  is transport number of electron, and  $F$  is faradic constant. Considering the effective area in our single cell is 0.38465 cm<sup>2</sup>, 0.469 ml/min hydrogen should be added to simulate the electrolysis system.

## Reference

- [1] G. Wu, K. Xie, Y. Wu, W. Yao and J. Zhou, *J. Power Sources*, 2013, **232**, 187-192.
- [2] T.H. Shin, J.-h. Myung, K.M. Naeem, C. Savaniu and J.T. Irvine, *Solid State Ionics*, 2015, **275**, 106-109.
- [3] K. Xie, Y. Zhang, G. Meng and J.T. Irvine, *J. Mater. Chem.*, 2011, **21**, 195-198.
- [4] N. Danilov, A. Tarutin, J. Lyagaeva, G. Vdovin and D. Medvedev, *J. Mater. Chem. A*, 2018, **6**, 16341-16346.
- [5] L. Lei, Z. Tao, X. Wang, J.P. Lemmon and F. Chen, *J. Mater. Chem. A*, 2017, **5**, 22945-22951.
- [6] L. Bi, S.P. Shafi and E. Traversa, *J. Mater. Chem. A*, 2015, **3**, 5815-5819.

- [7] D. Huan, N. Shi, L. Zhang, W. Tan, Y. Xie, W. Wang, C. Xia, R. Peng and Y. Lu, *ACS Appl. Mater. Interfaces*, 2018, **10**, 1761-1770.
- [8] L. Chen, F. Chen and C. Xia, *Energy Environ. Sci.*, 2014, **7**, 4018-4022.
- [9] M. Zheng, S. Wang, Y. Yang and C. Xia, *J. Mater. Chem. A*, 2018, **6**, 2721-2729.
- [10] S. Yang, Y. Wen, J. Zhang, Y. Lu, X. Ye and Z. Wen, *Electrochim. Acta*, 2018, **267**, 269-277.
- [11] W. Li, B. Guan, L. Ma, S. Hu, N. Zhang and X. Liu, *J. Mater. Chem. A*, 2018, **6**, 18057-18066.
- [12] J. Kim, A. Jun, O. Gwon, S. Yoo, M. Liu, J. Shin, T. H. Lim and G. Kim, *Nano Energy*, 2018, **44**, 121-126.
